# Supplementary material
Source: Springer Nature journal article supplement (https://www.springermedizin.de/resource/supplementary/13231_2010_20_MOESM2_ESM.pdf/9676346)

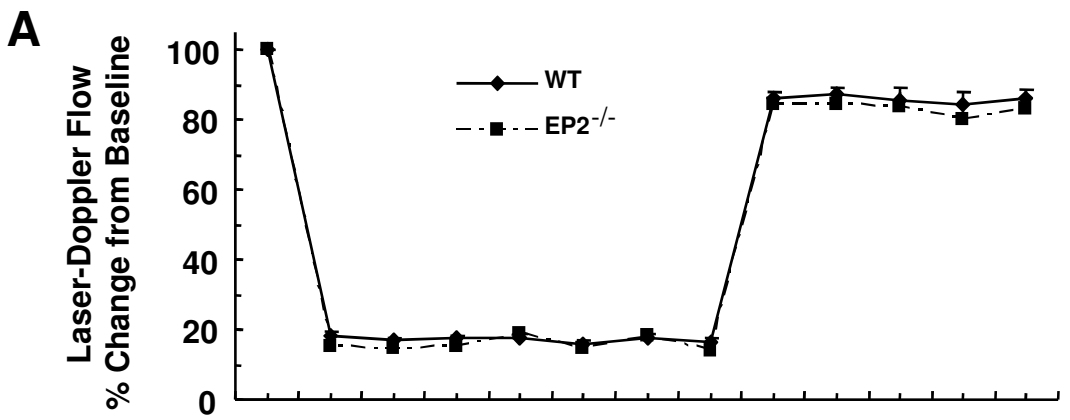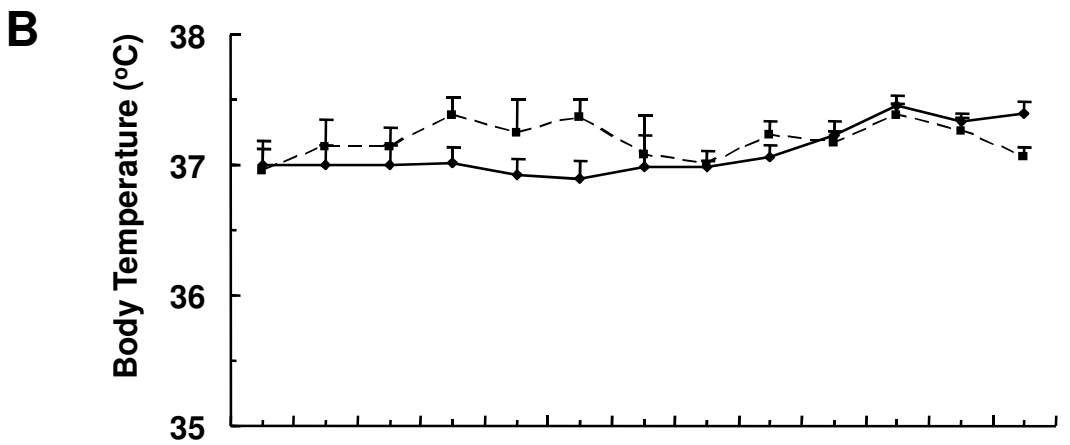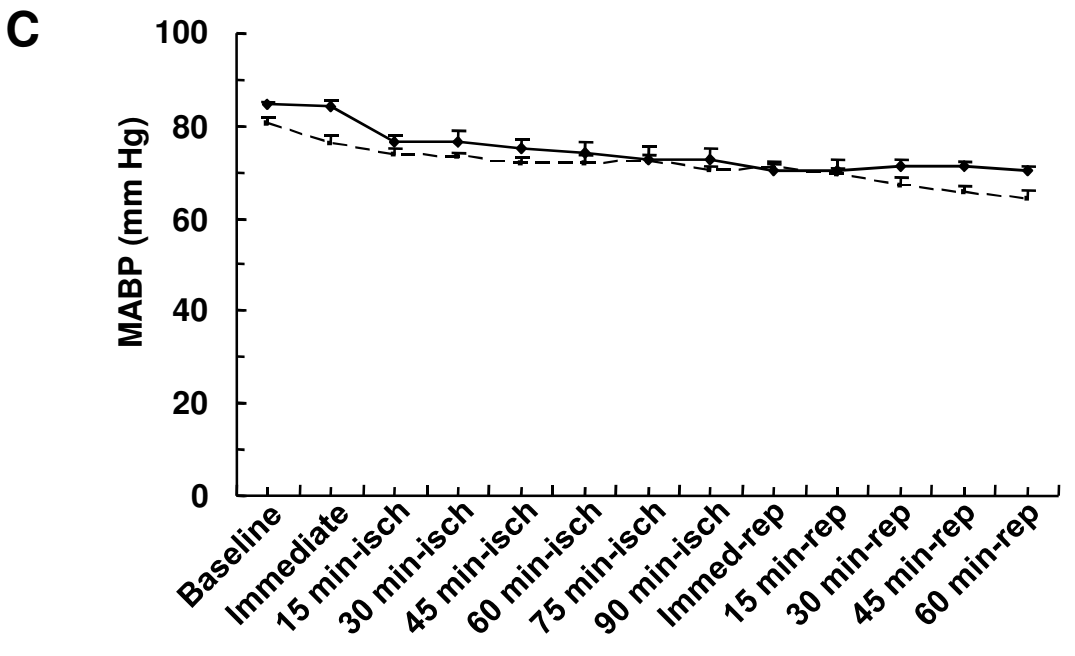

Supplement: MOESM2 [file 9676346]
